# Supplementary material for: Comprehensive bioinformatics analysis of Mycoplasma pneumoniae genomes to investigate underlying population structure and type-specific determinants
Source: PLoS One. 2017 Apr 14;12(4):e0174701. doi: 10.1371/journal.pone.0174701 (PMC5391922; doi:10.1371/journal.pone.0174701)
Supplement: S8 Table — (XLSX) [file pone.0174701.s015.xlsx]

## Sheet: Sheet1
S8 Table. Allele differences (n=520) between M. pneumoinae types 1 and 2.
SNP Loation	Alternate Allele	Gene Description	Start Coordinate	End Coordinate	Locus Tag	Protein ID
959	T	DNA polymerase III subunit beta	690	1833	F539_RS00005	WP_014325278.1
2028	A	molecular chaperone DnaJ	1836	2766	F539_RS00010	WP_010874359.1
3458	C	DNA gyrase subunit B	2852	4805	F539_RS00015	WP_010874360.1
3746	C	DNA gyrase subunit B	2852	4805	F539_RS00015	WP_010874360.1
5869	C	DNA gyrase subunit A	4804	7324	F539_RS00020	WP_014574838.1
6401	T	DNA gyrase subunit A	4804	7324	F539_RS00020	WP_014574838.1
6917	G	DNA gyrase subunit A	4804	7324	F539_RS00020	WP_014574838.1
11499	G	deoxyribonuclease	11258	12044	F539_RS00045	WP_014325282.1
16162	G	hypothetical protein	15850	16489	F539_RS00075	WP_010874371.1
16688	C	hypothetical protein	16465	17323	F539_RS00080	WP_014325284.1
16927	G	hypothetical protein	16465	17323	F539_RS00080	WP_014325284.1
18318	G	methenyltetrahydrofolate cyclohydrolase	18163	18973	F539_RS00090	WP_014325285.1
18691	A	methenyltetrahydrofolate cyclohydrolase	18163	18973	F539_RS00090	WP_014325285.1
19698	T	ABC transporter ATP-binding protein	19308	21180	F539_RS00105	WP_014325286.1
20085	G	ABC transporter ATP-binding protein	19308	21180	F539_RS00105	WP_014325286.1
20881	A	ABC transporter ATP-binding protein	19308	21180	F539_RS00105	WP_014325286.1
23089	A	helicase	23005	26098	F539_RS00115	WP_014325288.1
23900	C	helicase	23005	26098	F539_RS00115	WP_014325288.1
27932	C	proline iminopeptidase	27299	28229	F539_RS00125	WP_010874379.1
28543	G	methionine--tRNA ligase	28228	29767	F539_RS00130	WP_014325290.1
28825	C	methionine--tRNA ligase	28228	29767	F539_RS00130	WP_014325290.1
29408	G	methionine--tRNA ligase	28228	29767	F539_RS00130	WP_014325290.1
29745	T	methionine--tRNA ligase	28228	29767	F539_RS00130	WP_014325290.1
30395	G	fructose-bisphosphate aldolase	30227	31094	F539_RS00140	WP_014325292.1
31451	C	GTP-binding protein YchF	31094	32195	F539_RS00145	WP_014325293.1
32293	C	hypothetical protein	32184	33009	F539_RS00150	WP_014325294.1
32349	A	hypothetical protein	32184	33009	F539_RS00150	WP_014325294.1
33101	C	glycosyl transferase family A	33041	33941	F539_RS00155	WP_014325295.1
33543	A	glycosyl transferase family A	33041	33941	F539_RS00155	WP_014325295.1
37380	T	DNA polymerase III subunit alpha	36782	41114	F539_RS00185	WP_014574846.1
38735	T	DNA polymerase III subunit alpha	36782	41114	F539_RS00185	WP_014574846.1
39052	T	DNA polymerase III subunit alpha	36782	41114	F539_RS00185	WP_014574846.1
39423	C	DNA polymerase III subunit alpha	36782	41114	F539_RS00185	WP_014574846.1
40885	A	DNA polymerase III subunit alpha	36782	41114	F539_RS00185	WP_014574846.1
41074	A	DNA polymerase III subunit alpha	36782	41114	F539_RS00185	WP_014574846.1
41421	T	hypothetical protein	41391	43392	F539_RS00190	WP_010874392.1
42216	T	hypothetical protein	41391	43392	F539_RS00190	WP_010874392.1
43598	C	hypothetical protein	43563	45585	F539_RS00195	WP_014325298.1
44353	A	hypothetical protein	43563	45585	F539_RS00195	WP_014325298.1
44612	A	hypothetical protein	43563	45585	F539_RS00195	WP_014325298.1
45062	C	hypothetical protein	43563	45585	F539_RS00195	WP_014325298.1
47502	G	hypothetical protein	47176	48193	F539_RS00210	WP_014574849.1
48108	G	hypothetical protein	47176	48193	F539_RS00210	WP_014574849.1
48661	G	hypothetical protein	48652	49213	F539_RS00220	WP_014325303.1
48699	C	hypothetical protein	48652	49213	F539_RS00220	WP_014325303.1
48957	T	hypothetical protein	48652	49213	F539_RS00220	WP_014325303.1
50048	G	hypothetical protein	49274	51293	F539_RS00225	WP_014574850.1
51364	T	non-coding region	51293	51616
51741	T	glycerol transporter	51616	52411	F539_RS00230	WP_014325305.1
52625	C	thymidine kinase	52381	53032	F539_RS00235	WP_014325306.1
53036	T	non-coding region	53032	53058
55666	G	aspartate--tRNA(Asp/Asn) ligase	54274	55948	F539_RS00245	WP_010874403.1
61292	G	membrane protein	59602	61501	F539_RS00260	WP_014325308.1
61305	C	membrane protein	59602	61501	F539_RS00260	WP_014325308.1
61657	T	non-coding region	61501	61712
63636	T	hypothetical protein	63477	64632	F539_RS00275	WP_014325310.1
63664	A	hypothetical protein	63477	64632	F539_RS00275	WP_014325310.1
64200	C	hypothetical protein	63477	64632	F539_RS00275	WP_014325310.1
64749	C	non-coding region	64632	64814
64842	G	hypothetical protein	64814	66788	F539_RS00280	WP_014325311.1
66952	A	phosphocarrier protein HPr	66805	67072	F539_RS00285	WP_010874410.1
68525	C	non-coding region	67767	68597
71448	C	spermidine/putrescine import ATP-binding protein PotA	70374	72057	F539_RS00305	WP_010874412.1
71622	C	spermidine/putrescine import ATP-binding protein PotA	70374	72057	F539_RS00305	WP_010874412.1
71730	C	spermidine/putrescine import ATP-binding protein PotA	70374	72057	F539_RS00305	WP_010874412.1
74934	G	lipoprotein	73756	75214	F539_RS00320	WP_014325314.1
76984	C	S-adenosylmethionine synthase	76156	77308	F539_RS00330	WP_010874417.1
77445	A	hypothetical protein	77283	77565	F539_RS00335	WP_014574859.1
77589	T	non-coding region	77565	77595
78035	A	signal recognition particle protein	77595	78948	F539_RS00340	WP_014325315.1
79132	G	purine-nucleoside phosphorylase	79003	79720	F539_RS00345	WP_014325316.1
79168	G	purine-nucleoside phosphorylase	79003	79720	F539_RS00345	WP_014325316.1
79290	A	purine-nucleoside phosphorylase	79003	79720	F539_RS00345	WP_014325316.1
81348	C	thymidine phosphorylase	80384	81650	F539_RS00355	WP_014325318.1
82387	C	phosphomannomutase	82051	83716	F539_RS00365	WP_014325319.1
83198	G	phosphomannomutase	82051	83716	F539_RS00365	WP_014325319.1
83635	A	phosphomannomutase	82051	83716	F539_RS00365	WP_014325319.1
84123	A	hypothetical protein	83683	84646	F539_RS00370	WP_014325320.1
84143	T	hypothetical protein	83683	84646	F539_RS00370	WP_014325320.1
85139	T	50S ribosomal protein L33	85036	85183	F539_RS00380	WP_010874426.1
85964	T	rRNA (cytidine-2'-O-)-methyltransferase	85568	86399	F539_RS00390	WP_014325321.1
86852	A	ribonuclease M5	86380	86917	F539_RS00395	WP_010874429.1
87440	T	ribose-phosphate pyrophosphokinase	86895	87882	F539_RS00400	WP_014574862.1
89891	G	hypothetical protein	89269	90964	F539_RS00415	WP_010874433.1
91064	T	non-coding region	90964	91169
91217	C	hypothetical protein	91169	92855	F539_RS00420	WP_017532733.1
93265	C	fructose permease IIC protein	93161	95246	F539_RS00430	WP_014325324.1
95559	G	phosphofructokinase	95238	96141	F539_RS00435	WP_014325325.1
96083	G	phosphofructokinase	95238	96141	F539_RS00435	WP_014325325.1
97574	G	ABC transporter permease	96377	100538	F539_RS00440	WP_014325326.1
97601	A	ABC transporter permease	96377	100538	F539_RS00440	WP_014325326.1
98213	C	ABC transporter permease	96377	100538	F539_RS00440	WP_014325326.1
99933	G	ABC transporter permease	96377	100538	F539_RS00440	WP_014325326.1
100339	C	ABC transporter permease	96377	100538	F539_RS00440	WP_014325326.1
102619	G	transketolase	101955	103902	F539_RS00450	WP_014325327.1
102973	A	transketolase	101955	103902	F539_RS00450	WP_014325327.1
104115	T	hypothetical protein	103911	105513	F539_RS00455	WP_014325328.1
104133	T	hypothetical protein	103911	105513	F539_RS00455	WP_014325328.1
111078	T	hypothetical protein	110784	111090	F539_RS00490	WP_010874445.1
111100	C	non-coding region	111090	111449
123908	T	hypothetical protein	123258	124818	F539_RS00555	WP_017532742.1
133821	A	non-coding region	133629	134098
134165	G	hypothetical protein	134098	134671	F539_RS00605	WP_014574878.1
134188	T	hypothetical protein	134098	134671	F539_RS00605	WP_014574878.1
134497	C	hypothetical protein	134098	134671	F539_RS00605	WP_014574878.1
134637	A	hypothetical protein	134098	134671	F539_RS00605	WP_014574878.1
134669	T	hypothetical protein	134098	134671	F539_RS00605	WP_014574878.1
138030	T	phenylalanine--tRNA ligase subunit beta	136718	139136	F539_RS00625	WP_014325346.1
138192	A	phenylalanine--tRNA ligase subunit beta	136718	139136	F539_RS00625	WP_014325346.1
138428	C	phenylalanine--tRNA ligase subunit beta	136718	139136	F539_RS00625	WP_014325346.1
139778	T	non-coding region	139136	140004
139947	G	non-coding region	139136	140004
142106	G	hypothetical protein	141905	144482	F539_RS00645	WP_017532748.1
142387	T	hypothetical protein	141905	144482	F539_RS00645	WP_017532748.1
142606	G	hypothetical protein	141905	144482	F539_RS00645	WP_017532748.1
144957	T	hypothetical protein	144387	144969	F539_RS00650	WP_017532749.1
145084	G	adenine methylase	144985	146251	F539_RS00655	WP_026088309.1
148039	C	hypothetical protein	147491	148730	F539_RS00670	WP_053344054.1
148201	A	hypothetical protein	147491	148730	F539_RS00670	WP_053344054.1
149301	C	acyltransferase	148719	150522	F539_RS00675	WP_010874471.1
151200	A	translation initiation factor IF-3	150611	151217	F539_RS00680	WP_014325354.1
153349	G	terminal organelle assembly protein TopJ	152536	155269	F539_RS00700	WP_014325355.1
153552	C	terminal organelle assembly protein TopJ	152536	155269	F539_RS00700	WP_014325355.1
154946	T	terminal organelle assembly protein TopJ	152536	155269	F539_RS00700	WP_014325355.1
155824	C	nucleotide exchange factor GrpE	155291	155945	F539_RS00705	WP_014325356.1
157288	G	DNA topoisomerase IV subunit B	156435	158343	F539_RS00720	WP_014574880.1
158711	G	DNA topoisomerase IV subunit A	158342	160712	F539_RS00725	WP_014325358.1
159002	T	DNA topoisomerase IV subunit A	158342	160712	F539_RS00725	WP_014325358.1
159500	G	DNA topoisomerase IV subunit A	158342	160712	F539_RS00725	WP_014325358.1
159702	T	DNA topoisomerase IV subunit A	158342	160712	F539_RS00725	WP_014325358.1
160296	A	DNA topoisomerase IV subunit A	158342	160712	F539_RS00725	WP_014325358.1
161968	G	excinuclease ABC subunit C	161785	163588	F539_RS00735	WP_014325359.1
162232	T	excinuclease ABC subunit C	161785	163588	F539_RS00735	WP_014325359.1
172466	C	lipoprotein	171602	172508	F539_RS00790	WP_010874490.1
173221	G	ABC transporter ATP-binding protein	172531	174292	F539_RS00795	WP_014325365.1
173911	T	ABC transporter ATP-binding protein	172531	174292	F539_RS00795	WP_014325365.1
173988	G	ABC transporter ATP-binding protein	172531	174292	F539_RS00795	WP_014325365.1
174992	C	ABC transporter permease	174284	175274	F539_RS00800	WP_010874492.1
176434	C	non-coding region	176205	176782
178829	T	bifunctional oligoribonuclease and PAP phosphatase NrnA	178336	179311	F539_RS00820	WP_010874497.1
181013	A	adhesin P1	179323	184228	F539_RS00825	WP_053344055.1
181350	G	adhesin P1	179323	184228	F539_RS00825	WP_053344055.1
198690	C	hypothetical protein	198124	200599	F539_RS00885	WP_014325380.1
200853	T	hypothetical protein	200685	204027	F539_RS00890	WP_010874510.1
206093	A	translation initiation factor IF-2	206006	207860	F539_RS00905	WP_014325382.1
207217	T	translation initiation factor IF-2	206006	207860	F539_RS00905	WP_014325382.1
215055	A	hypothetical protein	214291	215254	F539_RS00940	WP_014574899.1
215319	C	non-coding region	215254	215500
215956	A	30S ribosomal protein S10	215932	216259	F539_RS00950	WP_010874521.1
216394	A	50S ribosomal protein L3	216272	217136	F539_RS00955	WP_014574901.1
217297	A	50S ribosomal protein L4	217135	217774	F539_RS00960	WP_014325387.1
217565	G	50S ribosomal protein L4	217135	217774	F539_RS00960	WP_014325387.1
219821	C	50S ribosomal protein L22	219617	220097	F539_RS00980	WP_014574902.1
225286	T	30S ribosomal protein S5	224707	225367	F539_RS01040	WP_010874539.1
226117	A	preprotein translocase subunit SecY	225825	227259	F539_RS01050	WP_014325391.1
227253	C	preprotein translocase subunit SecY	225825	227259	F539_RS01050	WP_014325391.1
230778	G	50S ribosomal protein L17	230736	231111	F539_RS01090	WP_010874549.1
235298	T	oligoendopeptidase F	234831	236667	F539_RS01115	WP_014325394.1
236708	A	adenine methylase	236666	237626	F539_RS01120	WP_014574905.1
237732	A	hypothetical protein	237719	240155	F539_RS01125	WP_019830469.1
237775	G	hypothetical protein	237719	240155	F539_RS01125	WP_019830469.1
238390	A	hypothetical protein	237719	240155	F539_RS01125	WP_019830469.1
238476	C	hypothetical protein	237719	240155	F539_RS01125	WP_019830469.1
239044	A	hypothetical protein	237719	240155	F539_RS01125	WP_019830469.1
250274	C	PTS glucose transporter subunit IIA	248696	251519	F539_RS01170	WP_014325402.1
251924	A	non-coding region	251688	252128
252438	C	30S ribosomal protein S2	252128	253013	F539_RS01180	WP_014325403.1
253896	C	magnesium-transporting ATPase	253005	255624	F539_RS01185	WP_014325404.1
254477	T	magnesium-transporting ATPase	253005	255624	F539_RS01185	WP_014325404.1
258026	C	preprotein translocase subunit SecA	255610	258037	F539_RS01190	WP_014325405.1
259898	C	excinuclease ABC subunit B	258011	259985	F539_RS01195	WP_010874568.1
260248	G	hypothetical protein	259987	260395	F539_RS01200	WP_010874569.1
261288	C	hypothetical protein	260499	263592	F539_RS01205	WP_014325406.1
261668	T	hypothetical protein	260499	263592	F539_RS01205	WP_014325406.1
262097	A	hypothetical protein	260499	263592	F539_RS01205	WP_014325406.1
262438	C	hypothetical protein	260499	263592	F539_RS01205	WP_014325406.1
263793	C	hypothetical protein	263588	264005	F539_RS01210	WP_010874571.1
264251	A	non-coding region	264005	264280
266643	C	oligopeptide transport ATP-binding protein OppD	266574	267846	F539_RS01225	WP_014325407.1
266728	G	oligopeptide transport ATP-binding protein OppD	266574	267846	F539_RS01225	WP_014325407.1
266859	T	oligopeptide transport ATP-binding protein OppD	266574	267846	F539_RS01225	WP_014325407.1
271614	C	peptidyl-tRNA hydrolase	271512	272079	F539_RS01245	WP_010874578.1
278330	A	30S ribosomal protein S6	278153	278801	F539_RS01280	WP_010874585.1
282067	G	hypothetical protein	281468	282833	F539_RS01305	WP_014325413.1
283878	A	hypothetical protein	282912	284814	F539_RS01310	WP_014574914.1
285716	C	non-coding region	285561	285758
285915	A	glutamyl-tRNA amidotransferase	285758	287198	F539_RS01320	WP_053344057.1
288505	T	glutamyl-tRNA(Gln) amidotransferase subunit A	287200	288637	F539_RS01325	WP_010874594.1
288511	C	glutamyl-tRNA(Gln) amidotransferase subunit A	287200	288637	F539_RS01325	WP_010874594.1
292376	A	DNA-binding protein WhiA	291635	292478	F539_RS01345	WP_010874598.1
296202	T	guanylate kinase	296130	296700	F539_RS01370	WP_014574918.1
299854	A	glucose-6-phosphate isomerase	299483	300776	F539_RS01390	WP_014325418.1
301023	T	ribulose-phosphate 3-epimerase	300753	301401	F539_RS01395	WP_010874608.1
302297	T	asparagine--tRNA ligase	301407	302775	F539_RS01400	WP_014325419.1
302461	C	asparagine--tRNA ligase	301407	302775	F539_RS01400	WP_014325419.1
303075	T	CDP-diacylglycerol--glycerol-3-phosphate 3-phosphatidyltransferase	302755	303415	F539_RS01405	WP_014574920.1
303694	T	non-coding region	303415	303934
303727	T	non-coding region	303415	303934
304324	C	hypothetical protein	303934	304690	F539_RS01415	WP_010874612.1
304814	T	hypothetical protein	304682	305354	F539_RS01420	WP_014574921.1
304928	C	hypothetical protein	304682	305354	F539_RS01420	WP_014574921.1
307106	C	sugar ABC transporter ATP-binding protein	306365	308084	F539_RS01430	WP_014325423.1
307131	A	sugar ABC transporter ATP-binding protein	306365	308084	F539_RS01430	WP_014325423.1
311816	G	DNA topoisomerase 1	310625	312761	F539_RS01445	WP_017532806.1
312461	A	DNA topoisomerase 1	310625	312761	F539_RS01445	WP_017532806.1
313081	A	hypothetical protein	312750	314178	F539_RS01450	WP_017532807.1
315132	G	hypothetical protein	314563	315409	F539_RS01460	WP_014325427.1
315740	A	tryptophan--tRNA ligase	315416	316457	F539_RS01465	WP_014325428.1
318290	C	metal-dependent phosphohydrolase	318072	319554	F539_RS01485	WP_014325429.1
319286	A	metal-dependent phosphohydrolase	318072	319554	F539_RS01485	WP_014325429.1
321191	C	non-coding region	320860	322564
321961	T	non-coding region	320860	322564
326330	C	lysine--tRNA ligase	325223	326693	F539_RS01535	WP_010874634.1
326537	G	lysine--tRNA ligase	325223	326693	F539_RS01535	WP_010874634.1
327143	C	UDP-galactopyranose mutase	326679	327852	F539_RS01540	WP_014574928.1
328819	C	elongation factor 4	327851	329648	F539_RS01545	WP_014325436.1
350309	C	DivIVA domain-containing protein	350304	350754	F539_RS01655	WP_014325447.1
350412	C	DivIVA domain-containing protein	350304	350754	F539_RS01655	WP_014325447.1
350933	A	holo-ACP synthase	350756	351116	F539_RS01660	WP_010874655.1
355469	C	pyruvate kinase	355046	356573	F539_RS01685	WP_010874660.1
358490	C	arginine deiminase	358169	358766	F539_RS01735	WP_014325449.1
362272	C	amino acid permease	360769	362467	F539_RS01750	WP_014325451.1
362558	A	non-coding region	362467	362600
363979	C	cytadherence accessory protein HMW2	363891	369348	F539_RS01760	WP_014325453.1
364735	G	cytadherence accessory protein HMW2	363891	369348	F539_RS01760	WP_014325453.1
366881	A	cytadherence accessory protein HMW2	363891	369348	F539_RS01760	WP_014325453.1
369574	G	hypothetical protein	369362	370436	F539_RS01765	WP_014325454.1
369632	G	hypothetical protein	369362	370436	F539_RS01765	WP_014325454.1
369740	T	hypothetical protein	369362	370436	F539_RS01765	WP_014325454.1
370985	C	hypothetical protein	370425	371082	F539_RS01770	WP_014325455.1
371177	A	hypothetical protein	371164	371437	F539_RS01775	WP_010874669.1
373142	C	16S rRNA (cytosine(1402)-N(4))-methyltransferase	372252	373179	F539_RS01790	WP_014325456.1
374408	A	hypothetical protein	373181	374441	F539_RS01795	WP_014325457.1
377301	G	hypothetical protein	377082	378594	F539_RS01810	WP_014325459.1
378791	T	non-coding region	378594	379088
379925	C	thymidylate synthase	379088	379952	F539_RS01815	WP_010874676.1
381051	T	ribonucleoside-diphosphate reductase subunit beta	380442	381462	F539_RS01825	WP_010874678.1
381583	G	ribonucleotide reductase assembly protein NrdI	381464	381926	F539_RS01830	WP_014325461.1
383821	C	ribonucleoside-diphosphate reductase subunit alpha	381949	384115	F539_RS01835	WP_014574945.1
384769	A	hypothetical protein	384556	384859	F539_RS01845	WP_017532771.1
391379	T	non-coding region	391140	393588
391852	T	non-coding region	391140	393588
393261	A	non-coding region	391140	393588
394234	C	ABC transporter ATP-binding protein	393588	394569	F539_RS01885	WP_014325466.1
394269	C	ABC transporter ATP-binding protein	393588	394569	F539_RS01885	WP_014325466.1
394303	C	ABC transporter ATP-binding protein	393588	394569	F539_RS01885	WP_014325466.1
394526	C	ABC transporter ATP-binding protein	393588	394569	F539_RS01885	WP_014325466.1
394644	C	hypothetical protein	394555	396781	F539_RS01890	WP_014325467.1
395207	A	hypothetical protein	394555	396781	F539_RS01890	WP_014325467.1
397115	T	nicotinate-nucleotide adenylyltransferase	396781	397831	F539_RS01895	WP_014574948.1
398331	G	hypothetical protein	397900	399766	F539_RS01900	WP_014325469.1
400239	C	hypothetical protein	399768	401667	F539_RS01905	WP_014325470.1
401613	T	hypothetical protein	399768	401667	F539_RS01905	WP_014325470.1
402237	A	hypothetical protein	401666	402341	F539_RS01910	WP_014325471.1
403158	A	ATPase AAA	402344	403934	F539_RS01915	WP_014574950.1
411931	C	hypothetical protein	411673	412021	F539_RS01945	WP_010874702.1
412442	G	type I restriction endonuclease	412227	413358	F539_RS01950	WP_014325477.1
412707	A	type I restriction endonuclease	412227	413358	F539_RS01950	WP_014325477.1
413730	G	death-on-curing family protein	413540	414275	F539_RS01955	WP_014574954.1
415078	C	metallophosphoesterase	414796	415642	F539_RS01965	WP_010874705.1
415132	A	metallophosphoesterase	414796	415642	F539_RS01965	WP_010874705.1
422180	C	23S rRNA (guanosine(2251)-2'-O)-methyltransferase RlmB	421751	422480	F539_RS01995	WP_014325480.1
423446	G	cysteine--tRNA ligase	422482	423796	F539_RS02000	WP_014325481.1
423919	G	DNA ligase (NAD(+)) LigA	423776	425753	F539_RS02005	WP_014574957.1
425283	A	DNA ligase (NAD(+)) LigA	423776	425753	F539_RS02005	WP_014574957.1
425619	C	DNA ligase (NAD(+)) LigA	423776	425753	F539_RS02005	WP_014574957.1
426628	G	hypothetical protein	425920	427525	F539_RS02015	WP_014325483.1
427337	G	hypothetical protein	425920	427525	F539_RS02015	WP_014325483.1
431781	C	hypothetical protein	431441	433823	F539_RS02050	WP_014325486.1
433098	G	hypothetical protein	431441	433823	F539_RS02050	WP_014325486.1
433312	T	hypothetical protein	431441	433823	F539_RS02050	WP_014325486.1
433355	T	hypothetical protein	431441	433823	F539_RS02050	WP_014325486.1
433813	T	hypothetical protein	431441	433823	F539_RS02050	WP_014325486.1
447934	G	hypothetical protein	447873	451296	F539_RS02125	WP_014325499.1
449729	T	hypothetical protein	447873	451296	F539_RS02125	WP_014325499.1
450320	A	hypothetical protein	447873	451296	F539_RS02125	WP_014325499.1
451878	T	hypothetical protein	451722	451947	F539_RS02135	WP_014325500.1
453156	A	DNA polymerase III subunit alpha	451950	454569	F539_RS02140	WP_014574962.1
456373	A	non-coding region	456281	456426
456726	T	haloacid dehalogenase	456426	457305	F539_RS02155	WP_010874737.1
457328	A	dephospho-CoA kinase	457298	457901	F539_RS02160	WP_010874738.1
459550	T	leucine--tRNA ligase	458681	461063	F539_RS02170	WP_014325502.1
463383	A	hypothetical protein	463348	463735	F539_RS02190	WP_014325503.1
463834	A	lipoate--protein ligase	463727	464747	F539_RS02195	WP_014574963.1
464883	T	dihydrolipoyl dehydrogenase	464773	466147	F539_RS02200	WP_014574964.1
467633	T	non-coding region	467356	467674
468749	G	pyruvate dehydrogenase E1 component subunit alpha	468679	469756	F539_RS02215	WP_010874749.1
471709	G	adenine phosphoribosyltransferase	471283	471817	F539_RS02225	WP_010874751.1
471936	G	hypothetical protein	471851	474767	F539_RS02230	WP_014574966.1
473086	T	hypothetical protein	471851	474767	F539_RS02230	WP_014574966.1
473606	T	hypothetical protein	471851	474767	F539_RS02230	WP_014574966.1
475480	A	guanosine-3',5'-bis(diphosphate) 3'-pyrophosphohydrolase	474770	476972	F539_RS02235	WP_014325508.1
478877	A	IgG-blocking protein M	478549	480298	F539_RS02250	WP_010874756.1
480630	G	tRNA-Gly	480585	480659	F539_RS02255	N/A
481071	C	transcription elongation factor GreA	481065	481548	F539_RS02280	WP_014325511.1
481429	G	transcription elongation factor GreA	481065	481548	F539_RS02280	WP_014325511.1
481562	C	non-coding region	481548	481829
481889	G	proline--tRNA ligase	481829	483281	F539_RS02285	WP_014574969.1
482706	A	proline--tRNA ligase	481829	483281	F539_RS02285	WP_014574969.1
485240	C	hypothetical protein	484820	485414	F539_RS02305	WP_014325515.1
486110	A	hypothetical protein	486107	488447	F539_RS02320	WP_014325516.1
488920	A	hypothetical protein	488674	490957	F539_RS02325	WP_014325517.1
489292	A	hypothetical protein	488674	490957	F539_RS02325	WP_014325517.1
489926	A	hypothetical protein	488674	490957	F539_RS02325	WP_014325517.1
490658	T	hypothetical protein	488674	490957	F539_RS02325	WP_014325517.1
490755	A	hypothetical protein	488674	490957	F539_RS02325	WP_014325517.1
490917	A	hypothetical protein	488674	490957	F539_RS02325	WP_014325517.1
498429	G	DNA repair protein HhH-GPD	498109	499252	F539_RS02360	WP_014325521.1
498877	A	DNA repair protein HhH-GPD	498109	499252	F539_RS02360	WP_014325521.1
499285	A	ABC transporter ATP-binding protein	499244	499979	F539_RS02365	WP_014325522.1
501968	G	Holliday junction DNA helicase	501600	502023	F539_RS02375	WP_014325523.1
502989	C	alanine--tRNA ligase	502022	504725	F539_RS02380	WP_014574975.1
503558	T	alanine--tRNA ligase	502022	504725	F539_RS02380	WP_014574975.1
503982	G	alanine--tRNA ligase	502022	504725	F539_RS02380	WP_014574975.1
504768	G	non-coding region	504725	504776
511027	G	chromosome partitioning protein Smc	509895	512844	F539_RS02415	WP_014574976.1
511105	A	chromosome partitioning protein Smc	509895	512844	F539_RS02415	WP_014574976.1
511312	C	chromosome partitioning protein Smc	509895	512844	F539_RS02415	WP_014574976.1
511391	A	chromosome partitioning protein Smc	509895	512844	F539_RS02415	WP_014574976.1
518960	G	ABC transporter ATP-binding protein	518125	519187	F539_RS02445	WP_014574979.1
522077	T	hypothetical protein	521981	523169	F539_RS02460	WP_014574981.1
522711	A	hypothetical protein	521981	523169	F539_RS02460	WP_014574981.1
523523	G	hypothetical protein	523178	526913	F539_RS02465	WP_014325532.1
523876	G	hypothetical protein	523178	526913	F539_RS02465	WP_014325532.1
525339	A	hypothetical protein	523178	526913	F539_RS02465	WP_014325532.1
525712	C	hypothetical protein	523178	526913	F539_RS02465	WP_014325532.1
525876	C	hypothetical protein	523178	526913	F539_RS02465	WP_014325532.1
527224	T	hypothetical protein	527164	530191	F539_RS02470	WP_014325533.1
528690	G	hypothetical protein	527164	530191	F539_RS02470	WP_014325533.1
529618	C	hypothetical protein	527164	530191	F539_RS02470	WP_014325533.1
530249	G	hypothetical protein	530132	530960	F539_RS02475	WP_026088312.1
530339	G	hypothetical protein	530132	530960	F539_RS02475	WP_026088312.1
530374	C	hypothetical protein	530132	530960	F539_RS02475	WP_026088312.1
532187	G	hypothetical protein	531123	533304	F539_RS02480	WP_014325535.1
532392	G	hypothetical protein	531123	533304	F539_RS02480	WP_014325535.1
532893	T	hypothetical protein	531123	533304	F539_RS02480	WP_014325535.1
533514	T	hypothetical protein	533310	533835	F539_RS02485	WP_026088313.1
533563	G	hypothetical protein	533310	533835	F539_RS02485	WP_026088313.1
534396	C	hypothetical protein	533851	534415	F539_RS02490	WP_026088314.1
535342	C	ATP-dependent RNA helicase	534832	536062	F539_RS02500	WP_014325539.1
537710	T	hypothetical protein	536068	540043	F539_RS02505	WP_026088315.1
538495	C	hypothetical protein	536068	540043	F539_RS02505	WP_026088315.1
539345	A	hypothetical protein	536068	540043	F539_RS02505	WP_026088315.1
539759	G	hypothetical protein	536068	540043	F539_RS02505	WP_026088315.1
539789	G	hypothetical protein	536068	540043	F539_RS02505	WP_026088315.1
540912	A	non-coding region	540907	540967
551889	T	hypothetical protein	551842	552424	F539_RS02555	WP_014325547.1
552930	T	hypothetical protein	552512	553376	F539_RS02560	WP_010874811.1
555975	T	hypothetical protein	553701	556719	F539_RS02575	WP_014574990.1
558011	C	cation transporter	557542	559240	F539_RS02615	WP_010874816.1
566755	G	non-coding region	565534	567141
568003	C	Xaa-Pro aminopeptidase	567913	568978	F539_RS02665	WP_014325558.1
568645	T	Xaa-Pro aminopeptidase	567913	568978	F539_RS02665	WP_014325558.1
569587	A	fatty acid-binding protein DegV	569157	570039	F539_RS02675	WP_010874828.1
569965	A	fatty acid-binding protein DegV	569157	570039	F539_RS02675	WP_010874828.1
572029	A	hypothetical protein	570837	574260	F539_RS02685	WP_014574996.1
572473	G	hypothetical protein	570837	574260	F539_RS02685	WP_014574996.1
573017	A	hypothetical protein	570837	574260	F539_RS02685	WP_014574996.1
573612	G	hypothetical protein	570837	574260	F539_RS02685	WP_014574996.1
574459	T	ribosome biogenesis GTPase Der	574296	575646	F539_RS02690	WP_010874831.1
574761	G	ribosome biogenesis GTPase Der	574296	575646	F539_RS02690	WP_010874831.1
574795	T	ribosome biogenesis GTPase Der	574296	575646	F539_RS02690	WP_010874831.1
576925	G	hypothetical protein	576327	576957	F539_RS02700	WP_010874833.1
585711	C	cysteine desulfurase	585457	586684	F539_RS02750	WP_014325562.1
587505	C	hypothetical protein	587089	591190	F539_RS02760	WP_014325563.1
588821	A	hypothetical protein	587089	591190	F539_RS02760	WP_014325563.1
592977	C	membrane protein	592773	594198	F539_RS02770	WP_014325565.1
593247	G	membrane protein	592773	594198	F539_RS02770	WP_014325565.1
593369	G	membrane protein	592773	594198	F539_RS02770	WP_014325565.1
593651	T	membrane protein	592773	594198	F539_RS02770	WP_014325565.1
594018	T	membrane protein	592773	594198	F539_RS02770	WP_014325565.1
594058	A	membrane protein	592773	594198	F539_RS02770	WP_014325565.1
594070	C	membrane protein	592773	594198	F539_RS02770	WP_014325565.1
596587	A	PTS ascorbate transporter subunit IIB	596328	596616	F539_RS02790	WP_014325567.1
596602	T	PTS ascorbate transporter subunit IIB	596328	596616	F539_RS02790	WP_014325567.1
600082	A	L-ribulose-5-phosphate 4-epimerase	599770	600499	F539_RS02805	WP_014325569.1
600479	A	L-ribulose-5-phosphate 4-epimerase	599770	600499	F539_RS02805	WP_014325569.1
612627	T	type I restriction modification protein	612264	613356	F539_RS02860	WP_014325573.1
613515	A	membrane protein	613383	615294	F539_RS02865	WP_017532690.1
614071	G	membrane protein	613383	615294	F539_RS02865	WP_017532690.1
614313	G	membrane protein	613383	615294	F539_RS02865	WP_017532690.1
617777	G	membrane protein	617651	618929	F539_RS02875	WP_036449547.1
618110	A	membrane protein	617651	618929	F539_RS02875	WP_036449547.1
618416	T	membrane protein	617651	618929	F539_RS02875	WP_036449547.1
622437	C	hypothetical protein	622275	622491	F539_RS02900	WP_017532691.1
623070	G	hypothetical protein	622787	623150	F539_RS02910	WP_014575015.1
624461	T	DNA-directed RNA polymerase subunit beta'	623311	627184	F539_RS02915	WP_014575016.1
626462	G	DNA-directed RNA polymerase subunit beta'	623311	627184	F539_RS02915	WP_014575016.1
628925	A	DNA-directed RNA polymerase subunit beta	627187	631363	F539_RS02920	WP_053344062.1
630689	C	DNA-directed RNA polymerase subunit beta	627187	631363	F539_RS02920	WP_053344062.1
631196	A	DNA-directed RNA polymerase subunit beta	627187	631363	F539_RS02920	WP_053344062.1
638058	A	tRNA (cytidine(34)-2'-O)-methyltransferase	637665	638166	F539_RS02950	WP_010874877.1
641938	G	hypothetical protein	641528	642770	F539_RS02985	WP_014325583.1
644116	A	membrane protein	643991	644669	F539_RS03000	WP_014325584.1
644310	A	membrane protein	643991	644669	F539_RS03000	WP_014325584.1
645099	T	inorganic pyrophosphatase	644723	645278	F539_RS03005	WP_014325585.1
645469	C	DNA recombination protein	645286	645805	F539_RS03010	WP_010874885.1
649609	T	hypothetical protein	649009	649858	F539_RS03030	WP_014325587.1
650722	G	acetate kinase	649865	651038	F539_RS03035	WP_014325588.1
650788	G	acetate kinase	649865	651038	F539_RS03035	WP_014325588.1
651561	A	hypothetical protein	651378	651801	F539_RS03045	WP_010874891.1
651815	G	Holliday junction DNA helicase RuvA	651806	652427	F539_RS03050	WP_010874892.1
652545	C	Holliday junction DNA helicase RuvB	652401	653325	F539_RS03055	WP_014325589.1
652820	T	Holliday junction DNA helicase RuvB	652401	653325	F539_RS03055	WP_014325589.1
654550	G	non-coding region	654549	654666
655680	C	50S ribosomal protein L32	655564	655738	F539_RS03075	WP_014325592.1
655794	G	30S ribosomal protein S20	655747	656011	F539_RS03080	WP_014325593.1
657162	T	methionyl-tRNA formyltransferase	656732	657668	F539_RS03090	WP_014325594.1
657772	A	hypothetical protein	657667	659662	F539_RS03095	WP_014575022.1
658865	A	hypothetical protein	657667	659662	F539_RS03095	WP_014575022.1
659202	T	hypothetical protein	657667	659662	F539_RS03095	WP_014575022.1
659644	G	hypothetical protein	657667	659662	F539_RS03095	WP_014575022.1
660973	G	phosphate acyltransferase PlsX	660483	661470	F539_RS03105	WP_014325596.1
662295	A	dihydroacetone kinase	661469	663146	F539_RS03110	WP_010874904.1
666306	C	hypothetical protein	666287	667133	F539_RS03130	WP_010874908.1
679964	T	non-coding region	679410	680881
680150	C	non-coding region	679410	680881
680775	T	non-coding region	679410	680881
681236	G	hypothetical protein	680881	681508	F539_RS03205	WP_014575024.1
682013	C	glycerophosphoryl diester phosphodiesterase	681509	682223	F539_RS03210	WP_014325603.1
682954	A	EAGR box-containing protein	682226	685337	F539_RS03215	WP_014325604.1
684348	C	EAGR box-containing protein	682226	685337	F539_RS03215	WP_014325604.1
685015	C	EAGR box-containing protein	682226	685337	F539_RS03215	WP_014325604.1
688200	A	ABC transporter ATP-binding protein	687440	689117	F539_RS03240	WP_014325606.1
690376	G	cytosol aminopeptidase	689220	690558	F539_RS03245	WP_010874929.1
692902	G	hypothetical protein	692743	693130	F539_RS03260	WP_014325607.1
694668	G	serine hydroxymethyltransferase	693563	694784	F539_RS03265	WP_014325608.1
694865	A	non-coding region	694784	694945
696302	A	non-coding region	696106	696423
697189	T	non-coding region	697071	697212
697242	C	hypothetical protein	697212	697635	F539_RS03285	WP_014325610.1
697450	A	hypothetical protein	697212	697635	F539_RS03285	WP_014325610.1
697832	G	hypothetical protein	697702	698500	F539_RS03290	WP_010874938.1
699350	A	hypothetical protein	698628	699996	F539_RS03295	WP_014575028.1
699796	C	hypothetical protein	698628	699996	F539_RS03295	WP_014575028.1
699972	A	hypothetical protein	698628	699996	F539_RS03295	WP_014575028.1
700436	C	putative lipoprotein	700070	701111	F539_RS03300	WP_014325612.1
701112	C	non-coding region	701111	701614
701712	G	hypothetical protein	701614	702022	F539_RS03310	WP_014325613.1
702390	G	hypothetical protein	702083	702992	F539_RS03315	WP_014325614.1
702690	T	hypothetical protein	702083	702992	F539_RS03315	WP_014325614.1
702795	A	hypothetical protein	702083	702992	F539_RS03315	WP_014325614.1
710408	C	lipoprotein	710375	711971	F539_RS03350	WP_014325622.1
712044	G	non-coding region	711971	712183
712501	A	hypothetical protein	712183	712657	F539_RS03355	WP_014325623.1
712750	G	non-coding region	712657	712797
712872	C	hypothetical protein	712797	713451	F539_RS03360	WP_014325624.1
714688	G	non-coding region	714669	715191
715570	G	hypothetical protein	715191	716757	F539_RS03370	WP_014325625.1
716016	C	hypothetical protein	715191	716757	F539_RS03370	WP_014325625.1
719039	A	hypothetical protein	718195	719905	F539_RS03390	WP_014325626.1
720213	A	ATP synthase epsilon chain	719904	720306	F539_RS03395	WP_010874954.1
724526	T	ATP synthase subunit delta	724133	724670	F539_RS03415	WP_014325629.1
727517	G	enolase	726934	728305	F539_RS03440	WP_010874963.1
733925	C	hypothetical protein	733837	734785	F539_RS03470	WP_014325631.1
738099	G	hypothetical protein	737915	738893	F539_RS03485	WP_017532707.1
740486	T	30S ribosomal protein S9	740219	740618	F539_RS03495	WP_014325637.1
740493	G	30S ribosomal protein S9	740219	740618	F539_RS03495	WP_014325637.1
742008	G	DNA polymerase III, subunit gamma and tau	741094	743140	F539_RS03505	WP_014325638.1
742082	T	DNA polymerase III, subunit gamma and tau	741094	743140	F539_RS03505	WP_014325638.1
742146	T	DNA polymerase III, subunit gamma and tau	741094	743140	F539_RS03505	WP_014325638.1
743308	A	excinuclease ABC subunit A	743148	745995	F539_RS03510	WP_014325639.1
748613	T	ribonuclease J	748537	750223	F539_RS03520	WP_010874978.1
750143	A	ribonuclease J	748537	750223	F539_RS03520	WP_010874978.1
754065	C	phosphoenolpyruvate--protein phosphotransferase	753335	755054	F539_RS03550	WP_014325643.1
754599	C	phosphoenolpyruvate--protein phosphotransferase	753335	755054	F539_RS03550	WP_014325643.1
754640	A	phosphoenolpyruvate--protein phosphotransferase	753335	755054	F539_RS03550	WP_014325643.1
754812	T	phosphoenolpyruvate--protein phosphotransferase	753335	755054	F539_RS03550	WP_014325643.1
755736	G	2,3-bisphosphoglycerate-independent phosphoglycerate mutase	755058	756585	F539_RS03555	WP_014325644.1
757363	G	non-coding region	757312	757364
757569	A	hypothetical protein	757364	758579	F539_RS03565	WP_014325645.1
757731	G	hypothetical protein	757364	758579	F539_RS03565	WP_014325645.1
757792	C	hypothetical protein	757364	758579	F539_RS03565	WP_014325645.1
758427	C	hypothetical protein	757364	758579	F539_RS03565	WP_014325645.1
758860	T	elongation factor Ts	758665	759562	F539_RS03570	WP_010874988.1
769921	G	hypothetical protein	769764	770544	F539_RS03630	WP_014575042.1
771045	A	hypothetical protein	770593	771445	F539_RS03635	WP_014325657.1
772269	G	hypothetical protein	771447	772299	F539_RS03640	WP_014575044.1
772443	G	lipoprotein	772298	773132	F539_RS03645	WP_014325659.1
773176	A	hypothetical protein	773154	774027	F539_RS03650	WP_014325660.1
773339	C	hypothetical protein	773154	774027	F539_RS03650	WP_014325660.1
773696	G	hypothetical protein	773154	774027	F539_RS03650	WP_014325660.1
774776	G	non-coding region	774548	775434
775033	T	non-coding region	774548	775434
775144	T	non-coding region	774548	775434
776203	A	non-coding region	776135	776278
777144	T	PTS mannose transporter subunit IIB	777134	778274	F539_RS03680	WP_014325661.1
777160	T	PTS mannose transporter subunit IIB	777134	778274	F539_RS03680	WP_014325661.1
777597	G	PTS mannose transporter subunit IIB	777134	778274	F539_RS03680	WP_014325661.1
777685	G	PTS mannose transporter subunit IIB	777134	778274	F539_RS03680	WP_014325661.1
780919	G	hypothetical protein	780805	781420	F539_RS03700	WP_014325663.1
781322	G	hypothetical protein	780805	781420	F539_RS03700	WP_014325663.1
782978	C	hypothetical protein	782677	783883	F539_RS03715	WP_014575048.1
783089	G	hypothetical protein	782677	783883	F539_RS03715	WP_014575048.1
784757	T	tRNA (guanosine(37)-N1)-methyltransferase TrmD	784241	784937	F539_RS03725	WP_014575049.1
785547	G	hypothetical protein	785287	786937	F539_RS03735	WP_014325668.1
786389	C	hypothetical protein	785287	786937	F539_RS03735	WP_014325668.1
787497	G	hypothetical protein	787356	788061	F539_RS03745	WP_014325669.1
788310	T	hypothetical protein	788067	788940	F539_RS03750	WP_014575051.1
788527	A	hypothetical protein	788067	788940	F539_RS03750	WP_014575051.1
791632	A	UTP--glucose-1-phosphate uridylyltransferase	790951	791827	F539_RS03765	WP_014325671.1
793207	C	tyrosine--tRNA ligase	792284	793484	F539_RS03775	WP_014325672.1
794991	C	hypothetical protein	794548	795130	F539_RS03785	WP_014575052.1
796857	A	ATP-dependent zinc metalloprotease FtsH	795113	797243	F539_RS03790	WP_010875028.1
797657	T	hypoxanthine-guanine phosphoribosyltransferase	797423	797951	F539_RS03795	WP_014325673.1
798007	A	hypothetical protein	797950	798460	F539_RS03800	WP_014325674.1
799117	C	L-lactate dehydrogenase	798631	799570	F539_RS03805	WP_010875031.1
800651	G	non-coding region	800391	801546
800779	T	non-coding region	800391	801546
800838	C	non-coding region	800391	801546
802590	T	phosphohydrolase	801546	802824	F539_RS03815	WP_014325676.1
803053	G	glutamate--tRNA ligase	802804	804259	F539_RS03820	WP_014575057.1
803200	C	glutamate--tRNA ligase	802804	804259	F539_RS03820	WP_014575057.1
806470	G	ribonuclease P protein component	806167	806524	F539_RS03835	WP_010875038.1
807604	A	ABC transporter ATP-binding protein	806682	807702	F539_RS03845	WP_014325678.1
810892	A	ABC transporter permease	807703	813352	F539_RS03850	WP_014575059.1
811495	C	ABC transporter permease	807703	813352	F539_RS03850	WP_014575059.1
813445	T	ABC transporter ATP-binding protein	813357	814212	F539_RS03855	WP_010875042.1
814433	G	chromosomal replication initiator protein DnaA	814280	815600	F539_RS03860	WP_014325680.1
815040	G	chromosomal replication initiator protein DnaA	814280	815600	F539_RS03860	WP_014325680.1
